# Supplementary material for: Facile Au catalyst loading on the inner shell of hollow SnO2spheres using Au-decorated block copolymer sphere templates and their selective H2S sensing characteristics
Source: Royal Society of Chemistry journal article supplement (doi:10.1039/c4nr03706e), 2014-08-08
Supplement: c4nr03706e1.pdf [file c4nr03706e1.pdf]

Supplementary information for  
**Facile Au catalyst loading on inner shell of hollow SnO<sub>2</sub> spheres  
using Au-decorated block copolymer sphere templates and their  
selective H<sub>2</sub>S sensing characteristics**

Seon-Jin Choi,<sup>‡a</sup> Minsoo P. Kim,<sup>‡b</sup> Seo-Jin Lee,<sup>a</sup> Bumjoon J. Kim<sup>\*b</sup> and Il-Doo Kim<sup>\*a</sup>

<sup>a</sup>Department of Material Science and Engineering, Korea Advanced Institute of Science and Technology (KAIST), Daejeon 305–701, Republic of Korea.

<sup>b</sup>Department of Chemical and Biomolecular Engineering, Korea Advanced Institute of Science and Technology (KAIST), Daejeon 305–701, Republic of Korea.

\*E-mail address: idkim@kaist.ac.kr; bumjoonkim@kaist.ac.kr

## Table of contents

1. Pristine SnO<sub>2</sub> hollow spheres:
2. Coating of sensing materials on patterned electrodes & sensor testing setup:
3. Size distribution of Au NPs on Au-BCP spheres:
4. Au nanoparticle size & distribution analysis using TEM:

### Pristine SnO<sub>2</sub> hollow spheres:

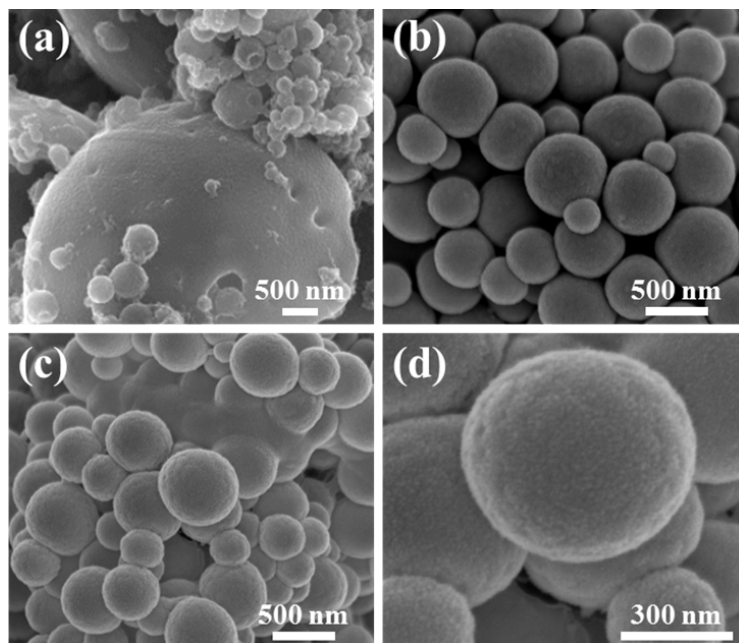

**Fig. S1** SEM images of (a) as-prepared BCP spheres without Au decoration, (b) thin SnO<sub>2</sub> layer coated BCP sphere, (c) SnO<sub>2</sub> microspheres after calcination at 500 °C for 1 h and (d) magnified image of (c).

### Coating of sensing materials on patterned electrodes & sensor testing setup:

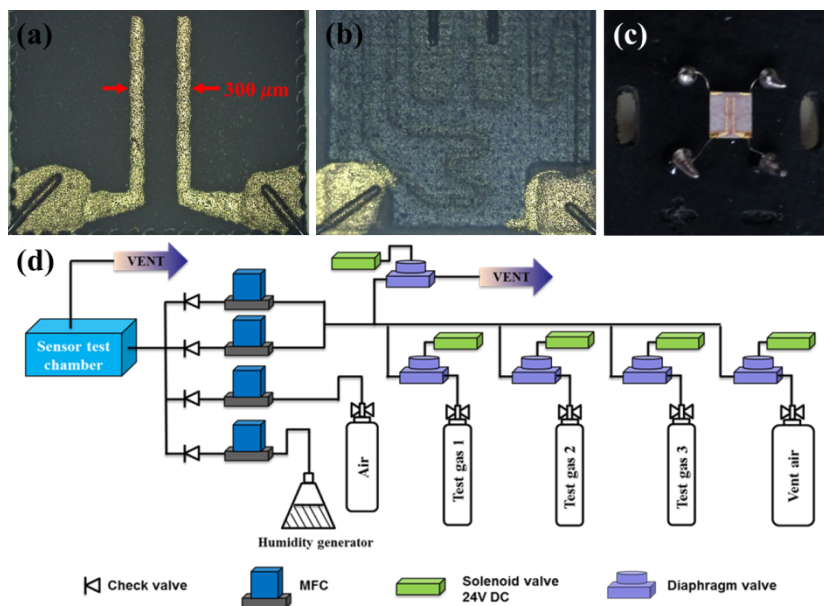

**Fig. S2** (a) Optical microscopic image of patterned Au electrodes (front side), (b) a patterned Pt heater (back side), (c) sensing material coated onto an Al<sub>2</sub>O<sub>3</sub> substrate, and (d) schematic illustration of sensor testing setup.

### Size distribution of Au NPs on Au-BCP spheres:

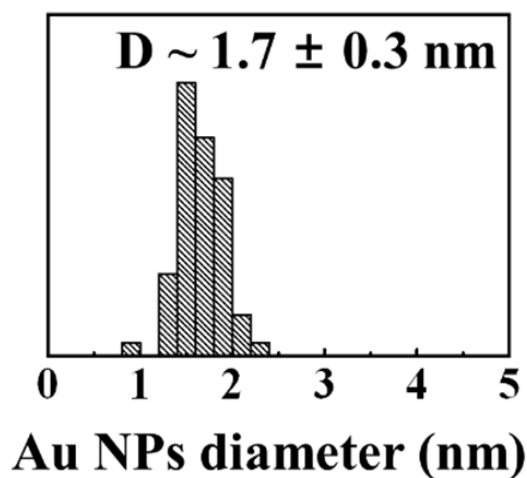

**Fig. S3** The histogram represents the diameter distribution of the Au NPs on the BCP spheres.

The diameter distribution of the Au NPs, which have an average diameter of  $1.7 \pm 0.3$  nm, on the sphere was determined from a TEM image using image-analysis software.<sup>1</sup>

### Au nanoparticle size & distribution analysis using TEM :

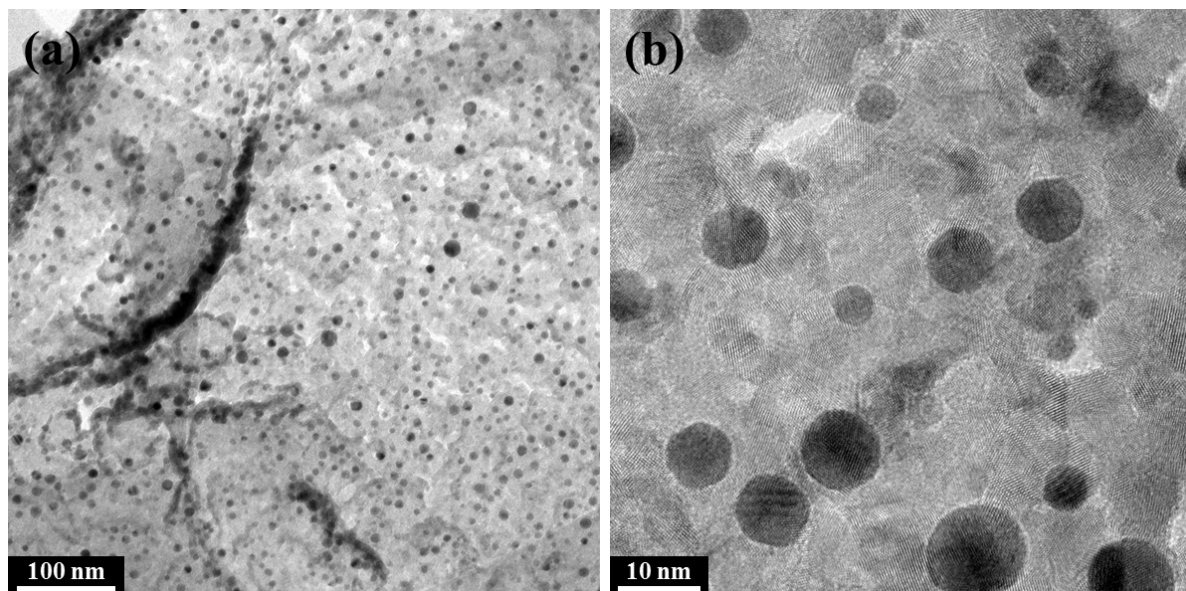

**Fig. S4** (a) TEM image of Au functionalized SnO<sub>2</sub> layer and (b) magnified TEM image of (a).

### References

1. M. P. Kim, D. J. Kang, D. W. Jung, A. G. Kannan, K. H. Kim, K. H. Ku, S. G. Jang, W. S. Chae, G. R. Yi and B. J. Kim, *ACS Nano*, 2012, 6, 2750-2757.
